# Supplementary material for: Identification of four novel QTL linked to the metabolic syndrome in the Berlin Fat Mouse
Source: PubMed Central journal article supplement (PMC8794782; doi:10.1038/s41366-021-00991-3), 2021-10-23
Supplement: 41366_2021_991_MOESM4_ESM.pdf [file 41366_2021_991_MOESM4_ESM.pdf]

| Traits           | QTL confidence interval |            |             |            |             | LOD(BH) | Var % | Mean S1 | Δ Mean S1-HET | Δ Mean S1-S2 |
|------------------|-------------------------|------------|-------------|------------|-------------|---------|-------|---------|---------------|--------------|
|                  | Chr                     | StartPos   | Top SNP ID  | TopPos     | StopPos     |         |       |         |               |              |
| GonAT weight [g] | 3                       | 95 763 020 | UNC5812781  | 98 196 163 | 100 780 367 | 6.5     | 12.6  | 1.32    | -0.35         | -0.89        |
| BGc [mg/dl]      | 3                       | 95 763 020 | UNC5812781  | 98 196 163 | 100 543 098 | 5.2     | 10    | 185     | -35           | -82          |
| GonAT weight [g] | 15                      | 67 855 285 | UNC25805470 | 68 461 862 | 74 582 319  | 5.1     | 9     | 1.29    | -0.41         | -0.79        |
| Body weight [g]  | 16                      | 3 892 297  | UNCHS041714 | 11 120 784 | 21 355 904  | 5.4     | 7.2   | 49.35   | 2.15          | 4.06         |
| GonAT weight [g] | 17                      | 9 483 181  | UNCHS043909 | 25 258 903 | 25 391 933  | 5       | 11.6  | 1.14    | -0.73         | -0.8         |
| Liver weight [g] | 17                      | 9 483 181  | UNCHS043909 | 25 258 903 | 25 391 933  | 5.5     | 8.2   | 3.48    | 0.41          | 0.61         |
| BGc [mg/dl]      | 17                      | 11 934 634 | UNCHS043909 | 25 258 903 | 26 054 796  | 6.9     | 15.1  | 289     | 78            | 105          |

Abbreviations: GonAT, gonadal adipose tissue; BGc, blood glucose concentration; QTL, quantitative trait locus; Chr, chromosome number; StartPos, TopPos, and StopPos, position of the start of the QTL confidence interval, position of the SNP with the highest LOD score, and position of the end of the QTL confidence interval in basepairs, respectively; Positions are given according to the Mouse Genome Version MM10, GRCm38.p3. Top SNP ID, ID of the top SNP; SNP, single-nucleotide polymorphism. The confidence interval gives the 1.5 LOD drop region of the top SNP position. A LOD score above 4.9 was deemed to be 'genome-wide highly significant' and above 4.2 was deemed 'genome-wide significant'; BH, Benjamini-Hochberg correction; LOD, logarithm (base 10) of odds; Var %, percentage of total variance explained; The Δ Mean columns show the phenotypic difference between homozygous S1 and heterozygous BFM1 animals (S1-HET) and the difference between homozygous S1 and S2 animals (S1-S2).
