# Supplementary material for: Identification of four novel QTL linked to the metabolic syndrome in the Berlin Fat Mouse
Source: PubMed Central journal article supplement (PMC8794782; doi:10.1038/s41366-021-00991-3), 2021-10-23
Supplement: 41366_2021_991_MOESM5_ESM.pdf [file 41366_2021_991_MOESM5_ESM.pdf]

| chromosome   | Position            | Direct QTL effect | Gene   | SIFT deleterious | SIFT tolerated | Domain | Stop gain/lost | Splice site | UTRs | Promoter | CTCF binds | Enhancer | Expression | Annotation | SCORE |
|--------------|---------------------|-------------------|--------|------------------|----------------|--------|----------------|-------------|------|----------|------------|----------|------------|------------|-------|
| Score points |                     |                   |        |                  |                |        |                |             |      |          |            |          |            |            |       |
| 3            | 97628804-97655282   |                   | Gatad1 | Fma5             | 3              | 1      | 3              | 3           | 3    | 1        | 3          | 1        | 1          | 2          | 1     |
| 3            | 98015127-98150361   |                   | Gatad1 | Nctc2h           | 0              | 1      | 3              | 0           | 0    | 1        | 3          | 0        | 1          | 2          | 1     |
| 3            | 98182461-98753812   |                   | Gatad1 | Zfp697           | 3              | 0      | 3              | 0           | 0    | 1        | 0          | 0        | 0          | 2          | 1     |
| 3            | 97950742-97912023   |                   | Gatad1 | Chn1             | 0              | 1      | 3              | 0           | 0    | 0        | 3          | 0        | 0          | 2          | 0     |
| 3            | 97689824-97888707   |                   | Gatad1 | Pdk4dip          | 0              | 1      | 3              | 0           | 0    | 1        | 3          | 0        | 1          | 0          | 0     |
| 3            | 98709255-98724543   |                   | Gatad1 | Hic3b2           | 3              | 0      | 3              | 0           | 0    | 0        | 0          | 0        | 0          | 2          | 1     |
| 3            | 98708743-98628353   |                   | Gatad1 | Cctd10           | 0              | 1      | 3              | 0           | 0    | 1        | 3          | 0        | 1          | 0          | 0     |
| 3            | 98618634-98630252   |                   | Gatad1 | Hic3b5           | 3              | 0      | 3              | 0           | 0    | 1        | 0          | 0        | 0          | 0          | 1     |
| 3            | 98696036-98699775   |                   | Gatad1 | Ankrd3a          | 3              | 0      | 3              | 0           | 0    | 1        | 0          | 0        | 0          | 0          | 0     |
| 3            | 98670131-98691023   |                   | Gatad1 | Ankrd55          | 0              | 1      | 3              | 0           | 0    | 0        | 3          | 0        | 0          | 0          | 7     |
| 3            | 95760241-95818863   |                   | Gatad1 | Rpru2            | 0              | 0      | 0              | 0           | 0    | 1        | 3          | 1        | 1          | 0          | 0     |
| 3            | 95617232-95617764   |                   | Gatad1 | Sf3b4            | 0              | 0      | 0              | 0           | 0    | 1        | 3          | 0        | 0          | 2          | 0     |
| 3            | 95046619-97077416   |                   | Gatad1 | Gjas             | 0              | 0      | 0              | 0           | 0    | 1        | 3          | 0        | 1          | 1          | 0     |
| 3            | 97658193-97673812   |                   | Gatad1 | Prkab2           | 0              | 0      | 0              | 0           | 0    | 1        | 3          | 0        | 0          | 1          | 5     |
| 3            | 96601149-96620171   |                   | Gatad1 | Lxll             | 0              | 0      | 0              | 0           | 0    | 1        | 3          | 0        | 0          | 0          | 4     |
| 3            | 96829384-96870706   |                   | Gatad1 | Psd1             | 0              | 0      | 0              | 0           | 0    | 1        | 3          | 0        | 0          | 0          | 4     |
| 3            | 96888281-96903346   |                   | Gatad1 | Gpr89            | 0              | 0      | 0              | 0           | 0    | 1        | 3          | 0        | 0          | 0          | 4     |
| 3            | 96845079-96857126   |                   | Gatad1 | Gm4400           | 0              | 1      | 3              | 0           | 0    | 0        | 0          | 0        | 0          | 0          | 0     |
| 3            | 100451628-100489124 |                   | Gatad1 | Tent5c           | 0              | 0      | 0              | 0           | 0    | 1        | 3          | 0        | 0          | 0          | 4     |
| 3            | 99141058-99239186   |                   | Gatad1 | Warr2            | 0              | 0      | 0              | 0           | 0    | 1        | 0          | 1        | 1          | 0          | 0     |
| 3            | 98222156-98236748   |                   | Gatad1 | Reg4             | 0              | 0      | 0              | 0           | 0    | 1        | 1          | 1        | 0          | 0          | 3     |
| 3            | 98711490-98727628   |                   | Gatad1 | Polr3c           | 0              | 1      | 0              | 0           | 0    | 0        | 1          | 1        | 0          | 0          | 3     |
| 3            | 97158777-97177299   |                   | Gatad1 | Acp6             | 0              | 0      | 0              | 0           | 0    | 1        | 0          | 0        | 0          | 2          | 0     |
| 3            | 95529246-95947390   |                   | Gatad1 | Ang22a           | 0              | 0      | 0              | 0           | 0    | 1        | 0          | 0        | 0          | 0          | 1     |
| 3            | 96162004-96171718   |                   | Gatad1 | Mtmr11           | 0              | 0      | 0              | 0           | 0    | 1        | 0          | 0        | 0          | 0          | 1     |
| 3            | 96913566-96920020   |                   | Gatad1 | Gja8             | 0              | 0      | 0              | 0           | 0    | 1        | 0          | 0        | 0          | 0          | 1     |
| 3            | 97901190-97923276   |                   | Gatad1 | Sec22b           | 0              | 0      | 0              | 0           | 0    | 1        | 0          | 0        | 0          | 0          | 1     |
| 15           | 72589620-73061204   |                   | Gatad2 | Trappc9          | 0              | 0      | 0              | 0           | 0    | 1        | 3          | 1        | 1          | 2          | 1     |
| 15           | 68083764-68258856   |                   | Gatad2 | Zfp              | 3              | 0      | 3              | 0           | 0    | 0        | 0          | 0        | 0          | 2          | 0     |
| 15           | 68298420-69101211   |                   | Gatad2 | Khdhct3          | 0              | 0      | 0              | 0           | 0    | 1        | 3          | 1        | 0          | 2          | 0     |
| 15           | 71431609-71727838   |                   | Gatad2 | Fam135b          | 3              | 0      | 3              | 0           | 0    | 0        | 0          | 0        | 0          | 0          | 7     |
| 16           | 4039971-4077827     |                   | Bwq26  | Trap1            | 0              | 1      | 3              | 0           | 0    | 0        | 0          | 0        | 0          | 2          | 1     |
| 16           | 13780708-13814839   |                   | Bwq26  | Rrs3             | 0              | 1      | 0              | 0           | 0    | 0        | 0          | 0        | 0          | 2          | 1     |
| 16           | 16983382-17047453   |                   | Bwq26  | Mapk1            | 0              | 0      | 0              | 0           | 0    | 1        | 0          | 0        | 0          | 1          | 2     |
| 16           | 13982109-13988388   |                   | Bwq26  | Ifitm7           | 0              | 0      | 0              | 0           | 0    | 1        | 0          | 0        | 0          | 0          | 1     |
| 17           | 12378608-12413851   |                   | Gatdq  | Pk               | 0              | 1      | 3              | 0           | 0    | 0        | 3          | 1        | 1          | 0          | 1     |
| 17           | 12942890-12960747   |                   | Gatdq  | Acat2            | 3              | 0      | 3              | 0           | 0    | 0        | 0          | 0        | 0          | 2          | 1     |
| 17           | 12923813-12946500   |                   | Gatdq  | Acat3            | 3              | 0      | 3              | 0           | 0    | 1        | 0          | 0        | 0          | 1          | 8     |
| 17           | 25133391-25162104   |                   | Gatdq  | Cloc7            | 0              | 0      | 0              | 0           | 0    | 1        | 3          | 1        | 1          | 2          | 0     |
| 17           | 25374285-25433783   |                   | Gatdq  | Cacna1h          | 3              | 0      | 3              | 0           | 0    | 0        | 0          | 0        | 0          | 0          | 1     |
| 17           | 25010205-25099495   |                   | Gatdq  | H3d0             | 0              | 1      | 0              | 0           | 0    | 0        | 3          | 0        | 0          | 2          | 1     |
| 17           | 25162461-25171913   |                   | Gatdq  | Cdc154           | 3              | 0      | 3              | 0           | 0    | 1        | 0          | 0        | 0          | 0          | 7     |
| 17           | 12227621-12318796   |                   | Gatdq  | Map3k4           | 0              | 1      | 3              | 0           | 0    | 0        | 0          | 1        | 1          | 0          | 0     |
| 17           | 10402012-10469311   |                   | Gatdq  | Pawg             | 0              | 0      | 0              | 0           | 0    | 1        | 3          | 0        | 0          | 0          | 2     |
| 17           | 10840384-12063361   |                   | Gatdq  | Prkn             | 0              | 0      | 0              | 0           | 0    | 1        | 3          | 1        | 1          | 0          | 0     |
| 17           | 15704967-15772610   |                   | Gatdq  | Chd1             | 0              | 0      | 0              | 0           | 0    | 1        | 3          | 0        | 0          | 2          | 0     |
| 17           | 25120760-25125292   |                   | Gatdq  | Pwat             | 3              | 0      | 3              | 0           | 0    | 0        | 0          | 0        | 0          | 0          | 6     |
| 17           | 25188397-25244443   |                   | Gatdq  | Unkl             | 0              | 0      | 0              | 0           | 0    | 1        | 3          | 1        | 1          | 0          | 0     |
| 17           | 25233331-25240124   |                   | Gatdq  | Gng8             | 0              | 0      | 0              | 0           | 0    | 1        | 3          | 0        | 0          | 2          | 0     |
| 17           | 12841079-12861143   |                   | Gatdq  | Map1             | 0              | 0      | 0              | 0           | 0    | 1        | 3          | 0        | 0          | 0          | 4     |
| 17           | 12911349-12916345   |                   | Gatdq  | Mrip18           | 0              | 0      | 0              | 0           | 0    | 1        | 3          | 0        | 0          | 0          | 4     |
| 17           | 12915701-12925067   |                   | Gatdq  | Tsp1             | 0              | 0      | 0              | 0           | 0    | 1        | 3          | 0        | 0          | 0          | 4     |
| 17           | 23941672-23945607   |                   | Gatdq  | Shp              | 0              | 1      | 3              | 0           | 0    | 0        | 0          | 0        | 0          | 0          | 4     |
| 17           | 25242659-25263864   |                   | Gatdq  | Balab3           | 0              | 0      | 0              | 0           | 0    | 1        | 3          | 0        | 0          | 0          | 4     |
| 17           | 25262416-25274622   |                   | Gatdq  | Unkl             | 0              | 0      | 0              | 0           | 0    | 1        | 3          | 0        | 0          | 0          | 4     |
| 17           | 13108817-13138810   |                   | Gatdq  | Unc93a           | 0              | 0      | 0              | 0           | 0    | 1        | 0          | 1        | 1          | 0          | 3     |
| 17           | 25184554-25187662   |                   | Gatdq  | BCO03965         | 0              | 0      | 0              | 0           | 0    | 1        | 0          | 0        | 0          | 2          | 0     |
| 17           | 25343345-25345662   |                   | Gatdq  | Tpsh1            | 0              | 0      | 0              | 0           | 0    | 1        | 0          | 0        | 0          | 2          | 0     |
| 17           | 13061104-13082481   |                   | Gatdq  | Tp10b            | 0              | 0      | 0              | 0           | 0    | 1        | 0          | 0        | 0          | 0          | 1     |
| 17           | 25308646-25311876   |                   | Gatdq  | Prs128           | 0              | 0      | 0              | 0           | 0    | 1        | 0          | 0        | 0          | 0          | 1     |
| 17           | 25318654-25323068   |                   | Gatdq  | Prs129           | 0              | 0      | 0              | 0           | 0    | 1        | 0          | 0        | 0          | 0          | 1     |
| 17           | 25366305-25369098   |                   | Gatdq  | Tpsh2            | 0              | 0      | 0              | 0           | 0    | 1        | 0          | 0        | 0          | 0          | 1     |
