# Supplementary material for: Identification of four novel QTL linked to the metabolic syndrome in the Berlin Fat Mouse
Source: PubMed Central journal article supplement (PMC8794782; doi:10.1038/s41366-021-00991-3), 2021-10-23
Supplement: 41366_2021_991_MOESM7_ESM.pdf [file 41366_2021_991_MOESM7_ESM.pdf]

| Name   | Species | SNP-Name    | Chr. | FAM | VIC/HEX | Assay | Direction | A1- FAM                  | A2- VIC/HEX                | C                         | Sequence                                                                                                                  |
|--------|---------|-------------|------|-----|---------|-------|-----------|--------------------------|----------------------------|---------------------------|---------------------------------------------------------------------------------------------------------------------------|
| KM_103 | Maus    | UNCH5041907 | 16   | C   | T       | 1     | for       | AGACTFACCTTGTAGTCTGGGC   | CCTFAGACTTACTTTGTAGTCTGGSE | GAGGAGTATGACACATGCCTT     | TGAGACAGGTTTCCTTGTATAATCCCTGGGTCTCTAGACTACTTTGTAGTCTGGG [F/C] TGCCTCCCAAGGCATGCTACTACTCTGGCCTTCCCTFACCTTTTCCTTTTT         |
| KM_104 | Maus    | JAX00063853 | 15   | A   | C       | 4     | rev       | AGACAAATGTTGGAACTTGTCAGT | GAACAATGTTGGAACTTGTCAAGG   | CCAAAGGAGGAACTCCCAAGAAGTA | GTAAGATTAGTCTGGAGAGCCYGGCTCCAAAGGAGAACTGCCAAGAGTAAAGCTG [A/C] CTGACAAGGTTCCCAACAATTTTCTCATGVTGTGGCTGVTCCAGACTGTAGCACTG    |
| KM_105 | Maus    | UNCH5043909 | 17   | A   | G       | 3     | for       | GCATCTGGGACACTTGGAGA     | GCATCTGGGACACTTGGAGG       | CTGGACAGTGTCAAGACTTGTGT   | CCAAGAGCAACACAGGATACTATGCGGTTGGCTGAGTCCATCTGGGAGACTTGGAG [G/A] GTCTGCTGGGAACACAGCTCTTGACATGTCCAGTGGGGTGTGGCAGGGCCT        |
| KM_106 | Maus    | UNC5812781  | 3    | A   | G       | 3     | for       | ATTTCTCAGGACAAATGGCTCA   | TCTCAGGACAAATGGCTCG        | AGGGGACAGCTGATTTGTGAGAA   | GCTTTCATGCAATGATCAATGGAAAGTGCATGATTTTCTCAGGACAAATCAATGGCTC [A/G] GACTTCTCACAATCAGCTCCCTCCCTGAAATTTGTGAGATTGTTTTAGGCTTCAG  |
| KM_107 | Maus    | UNC25805470 | 15   | A   | G       | 3     | rev       | CAGTACTATAAGACCTTGTAGGT  | AGGTACTATAAGACCTTGTAGGC    | CTTCTATCATGGCATTGGCTGCTA  | GCTAACTTCCAGGTTCTGAATGATCTTCTATCATGGCATTGGCTGCTACTGCTGGA [A/G] CCTACCAGGCTTATAGTACTCTGTACATATATTTGATTTGGCAGGCTCTCTCTC     |
| KM_109 | Maus    | UNCH5041714 | 16   | A   | G       | 3     | for       | AGCCTGGGATACAGATGAGA     | CTAGCCTGGGATACAGATGAGG     | GCACCCCATCCAGTTTATTCATCT  | GCTCTAAAGGCTAAGGTTGGAAGATTACAG VTCAGGCTAGCCTGGGATACAGATGAG [A/G] CCACCTCABAGATTAAGATGAATAACTGGATGGGGTGGCAGGCTTTAATCCCAACA |
| KM_111 | Maus    | UNC27568354 | 17   | A   | G       | 3     | for       | GACTTTGAGGGAAGCTTTCACA   | ACTTTGAGGGAAGCTTTCACG      | ATGAGGAAAAGGTATCTCATCTGTA | TATATGAAAACATCTCAATGTTCTGCCAGCTCAGCACTTTTGGAGAACTGCTTAC [G/A] TTACAGATGAGGATACCTTTTCCCTCATGCTGCAAGGCAGTTGAAGCAACCCAGTC    |
