# Supplementary material for: Identification of four novel QTL linked to the metabolic syndrome in the Berlin Fat Mouse
Source: PubMed Central journal article supplement (PMC8794782; doi:10.1038/s41366-021-00991-3), 2021-10-23
Supplement: 41366_2021_991_MOESM9_ESM.pdf [file 41366_2021_991_MOESM9_ESM.pdf]

| Long original name | Sequence              | Length<br>bp | Modification | Annealing<br>T in °C | DNA<br>type | Species | Chr. | Gene    | Method |
|--------------------|-----------------------|--------------|--------------|----------------------|-------------|---------|------|---------|--------|
| Fmo5-fwd           | ACTCAAGTGTCAAAGGGCTA  | 21           | no           | 57                   | cDNA(mouse) | Mouse   | 3    | Fmo5    | qpcr   |
| Fmo5-rev           | GGCCCCAGTAGTAACCGTAA  | 20           |              | 58                   |             |         | 3    | Fmo5    | qpcr   |
| Notch2-fwd         | AACATCGAGACCCCTGTGAG  | 20           |              | 59                   |             |         | 3    | Notch2  | qpcr   |
| Notch2-rev         | CACTGACACTGCTCCCTGT   | 20           |              | 59                   |             |         | 3    | Notch2  | qpcr   |
| Acat2-fwd          | ATGTCTTGACGGCAGGTTGT  | 20           |              | 59                   |             |         | 17   | Acat2   | qpcr   |
| Acat2-rev          | TTAGCTATTGCCGACACACC  | 21           |              | 60                   |             |         | 17   | Acat2   | qpcr   |
| Trappc9-fwd        | ATTCAGTGGAGAAGCGCATC  | 20           |              | 58                   |             |         | 15   | Trappc9 | qpcr   |
| Trappc9-rev        | CCGCTTCTGTAGTGTCTGC   | 20           |              | 58                   |             |         | 15   | Trappc9 | qpcr   |
| zfat-fwd           | AAGAAGCCAGCACTGAAGA   | 20           |              | 59                   |             |         | 15   | Zfat    | qpcr   |
| zfat-rev           | ACTCGTTACCCAGATTGAGCA | 21           |              | 59                   |             |         | 15   | Zfat    | qpcr   |
| Rrn3-fwd           | CATGTCACAGAGCCTTGCAA  | 20           |              | 58                   |             |         | 16   | Rrn3    | qpcr   |
| Rrn3-rev           | GCCGCGATACACTCACATC   | 19           |              | 58                   |             |         | 16   | Rrn3    | qpcr   |
| Trap1-fwd          | TACAGTCCAGTTAGGGGCC   | 20           |              | 58                   |             |         | 16   | Trap1   | qpcr   |
| Trap1-rev          | AGCTCTCGATGAACACCTCT  | 21           |              | 58                   |             |         | 16   | Trap1   | qpcr   |
